# Supplementary material for: Phosphorous-modified porous graphitic carbon nitride activated by phytic acid for efficient, selective extraction and photoreduction of uranium from aqueous solutions
Source: Royal Society of Chemistry journal article supplement (doi:10.1039/d5nj00456j), 2025-01-01
Supplement: d5nj00456j1.pdf [file d5nj00456j1.pdf]

1

2

3

## Supplementary materials

4

5

6 Phosphorous modified porous graphitic carbon nitride activated by phytic acid for efficient  
7 selective extraction and photoreduction of uranium from aqueous solutions

8

9 Yanni He,<sup>a</sup> Junjun Li,<sup>b,c,\*</sup> Jiang Cheng,<sup>c</sup> Tatyana Grigorievna Cherkasova,<sup>b</sup> Lu Li<sup>c</sup>

10

11 <sup>a</sup>Chongqing Water Resources and Electric Engineering College, Chongqing 402160, China

12 <sup>b</sup>Institute of Chemical and Gas and Oil Technologies, T.F. Gorbachev Kuzbass State Technical  
13 University, Kemerovo 650000, Russia

14 <sup>c</sup>School of Materials Science and Engineering, Chongqing University of Arts and Sciences,  
15 Chongqing 402160, China

16

---

\*Corresponding author. *Email address:* [lijunjun19861211@163.com](mailto:lijunjun19861211@163.com)

17 1. Data analysis

18 1.1. Kinetic data analysis

19 Pseudo-first order model ( $\ln(q_e - q_t) = \ln q_e - k_1 t$ ) and pseudo-second order model ( $t/q_t = 1/k_2 q_e^2$   
20  $+ t/q_e$ ) were applied to fit kinetic data, where  $q_e$  (mg/g) is the sorption capacity of U(VI) at the  
21 equilibrium,  $k_1$  (1/min) and  $k_2$  (g/mg·min) are the rate constants of pseudo-first order model  
22 and pseudo-second order model, respectively.

23 1.2. Sorption isotherm analysis

24 Langmuir model ( $q_e = q_{max} K_L C_e / (1 + K_L C_e$ , where  $K_L$  (L/mg) is the indicator of sorption enthalpy  
25 relied on temperatures,  $q_{max}$  is the maximum sorption capacity) and Freundlich model  
26 ( $q_e = K_F C_e^{1/n}$ , where  $K_F$  (mg<sup>1-n</sup>L<sup>n</sup>/g) and  $1/n$  are the parameters relied on  $q_e$  and sorption intensity  
27 respectively)) were applied to fit temperature-related sorption isotherms.

28 1.3. Thermodynamic data analysis

29 Standard free energy change ( $\Delta G^\circ$ ), the standard enthalpy change ( $\Delta H^\circ$ ) and the standard  
30 entropy change ( $\Delta S^\circ$ ) were calculated as  $K_d = (C_0 - C_e) V / C_e m$ ,  $\Delta G^\circ = -RT \ln K^\circ$ ,  $\ln K^\circ = \Delta S^\circ / R -$   
31  $\Delta H^\circ / RT$  and  $\Delta G^\circ = \Delta H^\circ - T \Delta S^\circ$ , where  $K_d$  is the equilibrium constant, T is the absolute  
32 temperature (K), and R is the universal gas constant 8.314 J/(mol K),  $K^\circ$  is the temperature-  
33 dependent equilibrium constant of sorption and can be obtained from the intercept of  $\ln K_d$  as a  
34 function of  $C_e$ .

35

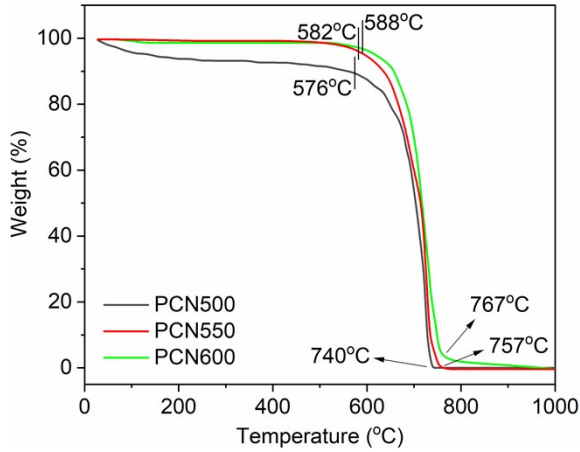

36

37 Figure S1. TGA curves of PCNs.

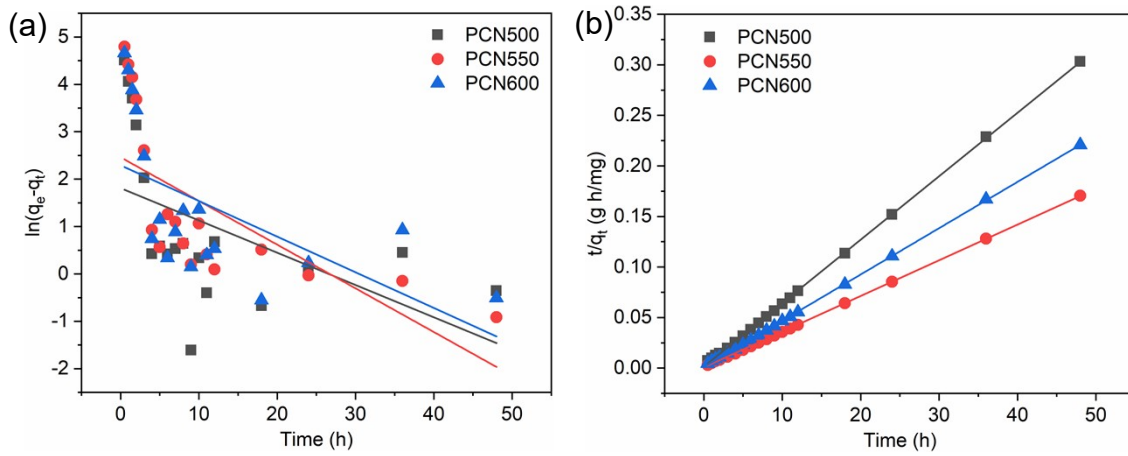

38

39 Figure S2. Pseudo-first-order (a) and pseudo-second-order (b) fittings for the sorption of U(VI)

40 on PCNs.  $C_{[U(VI)]_{initial}}=48.0$  mg/L, pH=5.0, T=298 K, m/V=0.1 g/L and I=0.01 mol/L NaNO<sub>3</sub>.

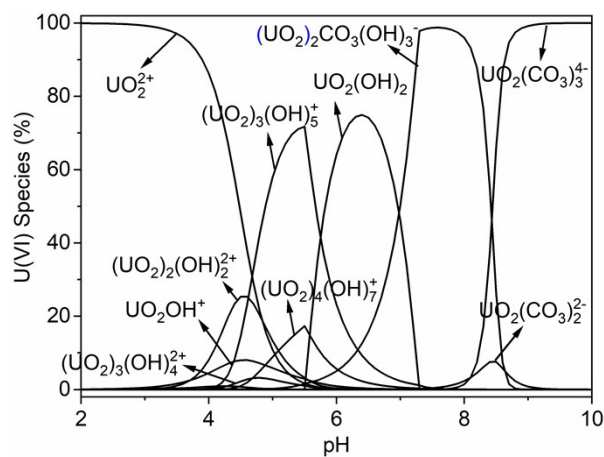

41

42 Figure S3. Distribution of uranium species states as a function of pH.

43

44 Table S1. Kinetic parameters of the sorption of U(VI) on PCNs (T = 298 K, pH = 5.0 ± 0.1,  
 45 and I = 0.01 mol/L NaNO<sub>3</sub>).

| Sorbents | $q_{e,exp}^a$<br>(mg/g) | Pseudo-first-order |                         |                | Pseudo-second-order |                       |                |
|----------|-------------------------|--------------------|-------------------------|----------------|---------------------|-----------------------|----------------|
|          |                         | $k_1$<br>(/min)    | $q_{e,cal}^b$<br>(mg/g) | R <sup>2</sup> | $k_2$<br>(g/min/mg) | $q_{e,cal}$<br>(mg/g) | R <sup>2</sup> |
| PCN500   | 158.3                   | 0.068              | 6.1                     | 0.255          | 0.027579            | 159.2                 | 0.999          |
| PCN550   | 281.6                   | 0.092              | 11.7                    | 0.463          | 0.018191            | 283.3                 | 0.999          |
| PCN600   | 217.4                   | 0.075              | 9.9                     | 0.312          | 0.021873            | 218.3                 | 0.999          |

46 <sup>a</sup>)Experimental uptake capacity.

47 <sup>b</sup>)Calculated uptake capacity of pseudo first or second order models.

48 Table S2. Langmuir and Freundlich fitting parameters for the sorption of U(VI) on PCNs.

| Sorbents | Tem | Langmuir parameters |              |       | Freundlich parameters                       |        |       |
|----------|-----|---------------------|--------------|-------|---------------------------------------------|--------|-------|
|          |     | $q_{max}$ (mg/g)    | $K_L$ (L/mg) | $R^2$ | $K_F$ (mg <sup>1-n</sup> L <sup>n</sup> /g) | $1/n$  | $R^2$ |
| PCN500   | 298 | 220.3               | 0.0115       | 0.983 | 17.36                                       | 0.6155 | 0.885 |
|          | 318 | 255.2               | 0.0139       | 0.987 | 19.93                                       | 0.6189 | 0.897 |
|          | 338 | 308.4               | 0.0165       | 0.989 | 21.78                                       | 0.6432 | 0.921 |
| PCN550   | 298 | 368.1               | 0.0353       | 0.983 | 56.67                                       | 0.5097 | 0.875 |
|          | 318 | 425.2               | 0.0264       | 0.971 | 55.58                                       | 0.5727 | 0.859 |
|          | 338 | 507.6               | 0.0271       | 0.985 | 55.31                                       | 0.6521 | 0.887 |
| PCN600   | 298 | 304.8               | 0.0127       | 0.976 | 23.13                                       | 0.6628 | 0.889 |
|          | 318 | 345.9               | 0.0111       | 0.984 | 24.64                                       | 0.6942 | 0.899 |
|          | 338 | 410.2               | 0.0131       | 0.985 | 24.96                                       | 0.7408 | 0.914 |

49

50 Table S3. Comparison of  $q_{max}$  values for the sorption of U(VI) on PCNs with other sorbents.

| Sorbents                                        | Experimental conditions | $q_{max}$ (mg/g) | References |
|-------------------------------------------------|-------------------------|------------------|------------|
| Wood pin chip biochar                           | pH 5.0, T 298 K         | 35.0             | 1          |
| Oxidized cow manure biochar                     | pH 4.5, T 298 K         | 73.3             | 2          |
| Switchgrass biochar                             | pH 3.9, T 298 K         | 2.12             | 3          |
| Amidoxime graphene oxide                        | pH 4.5, T 298 K         | 502.2            | 4          |
| Activated carbon                                | pH 3.0, T 293 K         | 28.3             | 5          |
| Amino modified graphene oxide                   | pH 6.0, T 298 K         | 80.2             | 6          |
| Magnetic biochar                                | pH 3.0, T 293 K         | 54.4             | 7          |
| Eucalyptus biochar                              | pH 5.5, T 293 K         | 27.2             | 8          |
| Oxidized MWCNTs                                 | pH 5.0, T 298 K         | 37.8             | 9          |
| Phosphate graphitic carbon nitride              | pH 5.0, T 298 K         | 333.5            | 10         |
| g-C <sub>3</sub> N <sub>4</sub> @Ni-Mg-Al-LDH   | pH 5.0, T 298 K         | 99.7             | 11         |
| U(VI)-imprinted g-C <sub>3</sub> N <sub>4</sub> | pH 5.0, T 298 K         | 859.7            | 12         |
| PCN500                                          | T 298 K, pH 5.0         | 158.3            | This study |
| PCN550                                          | T 298 K, pH 5.0         | 281.6            | This study |
| PCN600                                          | T 298 K, pH 5.0         | 217.4            | This study |

51

52 Table S4. Thermodynamic parameters for the sorption of U(VI) on PCNs.

| Sorbents | T (K) | $\Delta H^\circ$ (kJ/mol) | $\Delta S^\circ$ (J/mol K) | $\Delta G^\circ$ (kJ/mol) |
|----------|-------|---------------------------|----------------------------|---------------------------|
| PCN500   | 298   | 6.59                      | 97.78                      | -22.54                    |
|          | 318   | 6.62                      |                            | -24.47                    |
|          | 338   | 6.59                      |                            | -26.45                    |
| PCN550   | 298   | 6.07                      | 105.74                     | -25.44                    |
|          | 318   | 6.08                      |                            | -27.55                    |
|          | 338   | 6.07                      |                            | -29.68                    |
| PCN600   | 298   | 5.23                      | 97.03                      | -23.69                    |
|          | 318   | 5.24                      |                            | -25.62                    |
|          | 338   | 5.23                      |                            | -27.57                    |

53

54 Table S5. Components of the simulated wastewater.

| Coexist components                                 | Formula weight | Concentration (mg/L) |
|----------------------------------------------------|----------------|----------------------|
| CaCl <sub>2</sub> ·2H <sub>2</sub> O               | 147.0          | 4.0                  |
| NaCl                                               | 58.4           | 7.0                  |
| NH <sub>4</sub> NO <sub>3</sub>                    | 80.0           | 176.1                |
| K <sub>2</sub> HPO <sub>4</sub> ·3H <sub>2</sub> O | 228.2          | 36.7                 |
| CH <sub>3</sub> COONa                              | 82.0           | 204.9                |
| MgCl <sub>2</sub> ·6H <sub>2</sub> O               | 203.3          | 3.4                  |
| C <sub>6</sub> H <sub>5</sub> COONa                | 144.1          | 107.1                |
| total-P                                            | —              | 5.0                  |
| total-N                                            | —              | 61.6                 |
| total organic carbon                               | —              | 122.3                |
| biochemical oxygen demand                          | —              | 222.0                |
| total organic carbon                               | —              | 326.0                |

56 Table S6. Comparison of photoreduction rate of U(VI) on PCNs with other catalysts.

| Catalyst                                           | Conditions                          | Electron sacrifice         | $k$ (min <sup>-1</sup> )* | Ref.      |
|----------------------------------------------------|-------------------------------------|----------------------------|---------------------------|-----------|
| ZnFe <sub>2</sub> O <sub>4</sub>                   | 0.21 mM U(VI), m/V 0.2 g/L, pH 5.0  | 24.0 mM CH <sub>3</sub> OH | 0.067                     | [13]      |
| Ti <sub>3</sub> C <sub>2</sub> /SrTiO <sub>3</sub> | 0.21 mM U(VI), m/V 0.33 g/L, pH 4.0 | None                       | 0.008                     | [14]      |
| Nb/Titanate                                        | 0.084 mM U(VI), m/V 0.2 g/L, pH 5.0 | None                       | 0.009                     | [15]      |
| TiO <sub>2</sub>                                   | 0.42 mM U(VI), m/V 0.4 g/L, pH 5.5  | 200 mg/L HCOONa            | 0.015                     | [16]      |
| Sn-In <sub>2</sub> S <sub>3</sub>                  | 0.06 mM, m/V 0.15 g/L, pH 6.0       | None                       | 0.078                     | [17]      |
| g-C <sub>3</sub> N <sub>4</sub>                    | 0.084 mM U(VI), m/V 1.0 g/L, pH 4.0 | 20 ppm bisphenol A         | 0.098                     | [18]      |
| PCB/CN                                             | 0.42 mM U(VI), m/V 0.5 g/L, pH 4.0  | None                       | 0.049                     | [19]      |
| TiO <sub>2</sub>                                   | 0.168 mM U(VI), pH 2.0              | Methanol                   | 0.016                     | [20]      |
| P-g-C <sub>3</sub> N <sub>4</sub>                  | 0.12 mM U(VI), m/V 0.5 g/L, pH 7.0  | 2.5 vol% Methanol          | 0.110                     | [21]      |
| ZnO/rectorite                                      | 0.021 mM U(VI), m/V 1.5 g/L         | 1.0 M Methanol             | 0.014                     | [22]      |
| TiO <sub>2</sub>                                   | 0.21 mM U(VI), m/V 1g/L, pH 2.7     | 1.68 mM EDTA               | 0.002                     | [23]      |
| CaTiO <sub>3</sub>                                 | 0.084 mM U(VI), m/V 0.2 g/L, pH 7.5 | None                       | 0.011                     | [24]      |
| PCN500                                             | 48 mg/L U(VI), m/V 0.1 g/L, pH 7.0  | Methanol                   | 0.034                     | This work |
| PCN550                                             | 48 mg/L U(VI), m/V 0.1 g/L, pH 7.0  | Methanol                   | 0.057                     | This work |
| PCN600                                             | 48 mg/L U(VI), m/V 0.1 g/L, pH 7.0  | Methanol                   | 0.049                     | This work |

57 \*The reaction rates were calculated using the pseudo-first-order kinetics model.



58 References

- 59 1 M.S. Alam, D. Gorman-Lewis, N. Chen, S. Safari, K. Baek, K.O. Konhauser, D.S. Alessi,  
60 *Environ. Sci. Technol.* 2018, **52**, 13057–13067.
- 61 2 J. Jin, S. Li, X. Peng, W. Liu, C. Zhang, Y. Yang, L. Han, Z. Du, K. Sun, X. Wang,  
62 *Bioresource Technol.* 2018, **256**, 247–253.
- 63 3 S. Kumar, V.A. Loganathan, R.B. Gupta, M.O. Barnett, *J. Environ. Manage.* 2011, **92**,  
64 2504–2512.
- 65 4 Y. Wang, Z. Wang, R. Rang, J. Yang, N. Liu, J. Liao, Y. Yang, J. Tang, *RSC Adv.* 2015, **5**,  
66 89309–89318.
- 67 5 A. Mellah, S. Chegrouche, M. Barkat, *J. Colloid Interface Sci.* 2006, **296**, 434–441.
- 68 6 S. Verma, R.K. Dutta, *RSC Adv.* 2015, **5**, 77192–771203.
- 69 7 Q. Hu, Y. Zhu, B. Hu, S. Lu, G. Sheng, *J. Environ. Sci.* 2018, **70**, 217–225.
- 70 8 W. Mishra, M.K. Sureshkumar, N. Gupta, C.P. Kaushik, *Water Air Soil Poll.* 2017, **228**,  
71 309.
- 72 9 Y. Sun, S. Yang, G. Sheng, Z. Guo, X. Wang, *J. Environ. Radioact.* 2012, **105**, 40–47.
- 73 10 Z. Yang, C. Qi, P. Yuan, R. Hu, X. Du, M. Xiang, *J. Environ. Chem. Eng.* 2023, **11**,  
74 110272.
- 75 11 Y. Zou, P. Wang, W. Yao, X. Wang, Y. Liu, D. Yang, L. Wang, J. Hou, A. Alsaedi, T.  
76 Hayat, X. Wang, *Chem. Eng. J.* 2017, **330**, 573–584.
- 77 12 X. Hao, R. Chen, Q. Liu, J. Liu, H. Zhang, J. Yu, Z. Lia, J. Wang, *Inorg. Chem. Front.*,  
78 2018, **5**, 2218.
- 79 13 P.L. Liang, L.Y. Yuan, H. Deng, X.C. Wang, L. Wang, Z.J. Li, S.Z. Luo, W.Q. Shi, *Appl.*  
80 *Catal. B: Environ.* 2020, **267**, 118688.
- 81 14 H. Deng, Z. Li, L. Wang, L.Y. Yuan, J. Lan, Z.Y. Chang, Z.F. Chai, W.Q. Shi, *ACS Appl.*  
82 *Nano Mater.* 2019, **2**, 2283–2294.

- 83 15 X. Liu, P. Du, W. Pan, C. Dang, T. Qian, H. Liu, W. Liu, D. Zhao, *Appl. Catal. B: Environ.*  
84 2018, **231**, 11–22.
- 85 16 G. Wang, J. Zhen, L. Zhou, F. Wu, N. Deng, *J. Radioanal. Nucl. Chem.* 2015, **304**, 579–  
86 585.
- 87 17 J. Feng, Z. Yang, S. He, X. Niu, T. Zhang, A. Ding, H. Liang, X. Feng, *Chemosphere*  
88 2018, **212**, 114–123.
- 89 18 H. Wang, H. Guo, N. Zhang, Z. Chen, B. Hu, X. Wang, *Environ. Sci. Technol.* 2019, **53**,  
90 6454–6461.
- 91 19 F. Yu, Z. Yu, Z. Xu, J. Xiong, Q. Fan, X. Feng, Y. Tao, J. Hua, F. Luo, *Mol. Syst. Des.*  
92 *Eng.* 2020, **5**, 882–889.
- 93 20 C.J. Evans, G.P. Nicholson, D.A. Faith, M.J. Kan, *Green Chem.* 2004, **6**, 196–197.
- 94 21 X. Wu, S. Jiang, S. Song, C. Sun, *Appl. Surf. Sci.* 2018, **430**, 371–379.
- 95 22 Y. Guo, L. Li, Y. Li, Z. Li, X. Wang, G. Wang, *J. Radioanal. Nucl. Chem.* 2016, **310**, 883–  
96 890.
- 97 23 J. Chen, D.F. Ollis, W.H. Rulkens, H. Bruning, *Colloid. Surface. A* 1999, **151**, 339–349.
- 98 24 S. Lu, K. Zhu, T. Hayat, N.S. Alharbi, C. Chen, G. Song, D. Chen, Y. Sun, *J. Hazard.*  
99 *Mater.* 2019, **364**, 100–107.
